# Supplementary material
Source: PubMed Central journal article supplement (PMC6581638)
Supplement: NIHMS997771-supplement-2.pdf [file NIHMS997771-supplement-2.pdf]

## **Supplemental Figures**

### **Supplemental Figure 1: Taxa with greater than 1% relative abundance on practitioner stethoscopes.**

Taxa present on practitioner stethoscopes in Set A are depicted in a heatmap. Each column represents a different bacterial community (i.e., from the diaphragm of an individual practitioner stethoscope), each row represent a bacterial genus, and the color of the box represents the proportion of all bacterial sequences in that stethoscope bacterial community represented by that genus (relative abundance). Taxa with greater than 1% relative abundance at the genus level are shown.

### **Supplemental Figure 2: Quantification of bacterial contamination by qPCR on practitioner stethoscopes before and after cleaning.**

Bacterial contamination of practitioner stethoscopes was quantified by bacterial 16S qPCR. Cleaning was done using standardized (A) or practitioner-preferred method (B). The dashed line indicates the mean bacterial quantification measured on the clean stethoscopes. Both cleaning methods resulted a significant reduction in bacterial contamination (A:  $p=0.007$ ; C:  $p = 0.01645$ ; Student's t test); however, no practitioner stethoscopes fell below the clean stethoscope threshold in the standardized cleaning, while only two fell below the clean stethoscope threshold using the practitioner-preferred cleaning method.
