# Supplementary material
Source: PubMed Central journal article supplement (PMC6581638)

Figure S2

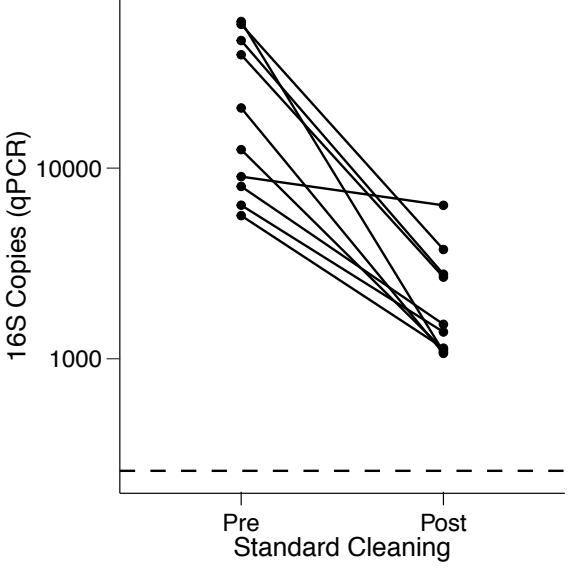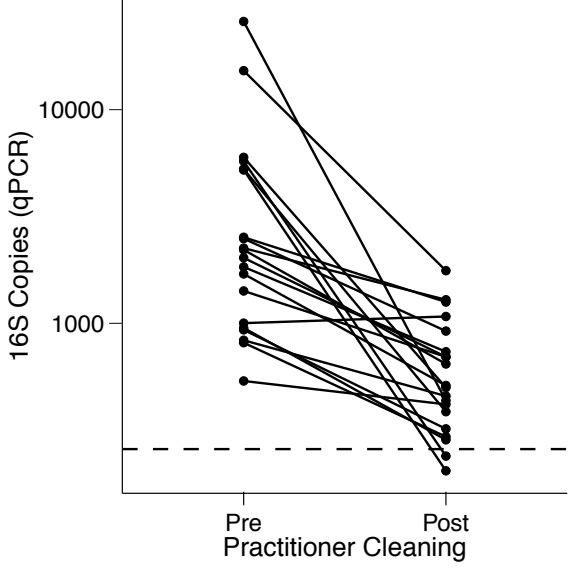

Supplement: NIHMS997771-supplement-1.pdf [file NIHMS997771-supplement-1.pdf]
